# Supplementary material for: Prior Infection by Colletotrichum spinaciae Lowers the Susceptibility to Infection by Powdery Mildew in Common Vetch
Source: MDPI journal article supplement (doi:10.3390/plants13010052), 2023-12-22
Supplement: s1 [file s1]

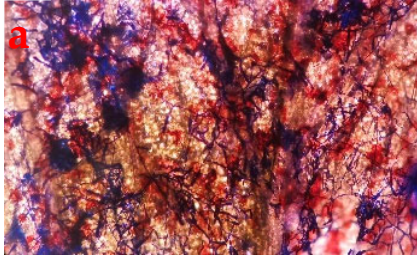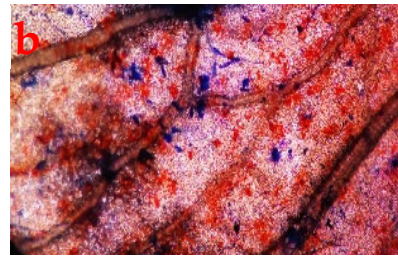

**Figure S1.** Morphological structures of powdery mildew observed by comassie brilliant blue staining.

(a) mycelium structure of  $C^-$  plant leaf; (b) mycelium symptoms of  $C^+$  plant leaf.

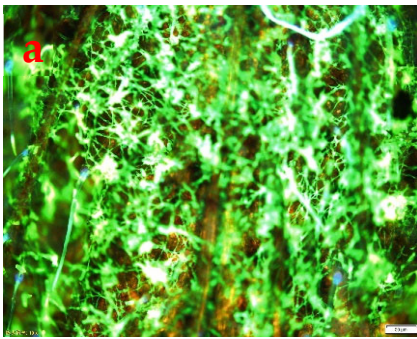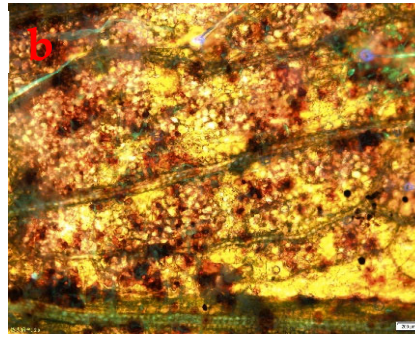

**Figure S2.** Morphological structures of powdery mildew observed by uranine fluorescence staining. (a)

mycelium structure of  $C^-$  plant leaf; (b) mycelium symptoms of  $C^+$  plant leaf.
